# Supplementary material for: Synergistical Use of Electrostatic and Hydrophobic Interactions for the Synthesis of a New Class of Multifunctional Nanohybrids: Plasmonic Magneto-Liposomes
Source: PubMed Central journal article supplement (PMC6915406; doi:10.3390/nano9111623), 2019-11-15
Supplement: nanomaterials-09-01623-s001.pdf [file nanomaterials-09-01623-s001.pdf]

## Supplementary Materials

# Synergistical Use of Electrostatic and Hydrophobic Interactions for the Synthesis of a New Class of Multifunctional Nanohybrids: Plasmonic Magneto-Liposomes

Gabriela Fabiola Știuțiuț <sup>1</sup>, Ștefan Nițică <sup>2</sup>, Valentin Toma <sup>2</sup>, Cristian Iacoviță <sup>3</sup>, Dietrich Zahn <sup>4</sup>, Romulus Tetean <sup>1</sup>, Emil Burzo <sup>1</sup>, Constantin Mihai Lucaciu <sup>3</sup> and Rareș Ionuț Știuțiuț <sup>2,3,\*</sup>

<sup>1</sup> Faculty of Physics, “Babeș-Bolyai” University, M. Kogălniceanu 1, 400084, Cluj-Napoca, Romania; gabi.stiuțiuț@phys.ubbcluj.ro (G.Ș.); romulus.tetean@phys.ubbcluj.ro (R.T.); emil.burzo@phys.ubbcluj.ro (E.B.)

<sup>2</sup> MedFuture Research Center for Advance Medicine, “Iuliu Hațieganu” University of Medicine and Pharmacy, L. Pasteur 4-6, 400349, Cluj-Napoca, Romania; stefan\_nitica@yahoo.com (Ș.N.); valentin.toma@umfcluj.ro (V.T.)

<sup>3</sup> Faculty of Pharmacy, “Iuliu Hațieganu” University of Medicine and Pharmacy, L. Pasteur 4-6, 400349, Cluj-Napoca, Romania; cristian.iacovita@umfcluj.ro (C.I.); clucaciu@umfcluj.ro (C.L.)

<sup>4</sup> Semiconductor Physics, Chemnitz University of Technology, D-09107 Chemnitz, Germany; zahn@physik.tu-chemnitz.de (D.Z.)

\* Correspondence: rares.stiuțiuț@umfcluj.ro

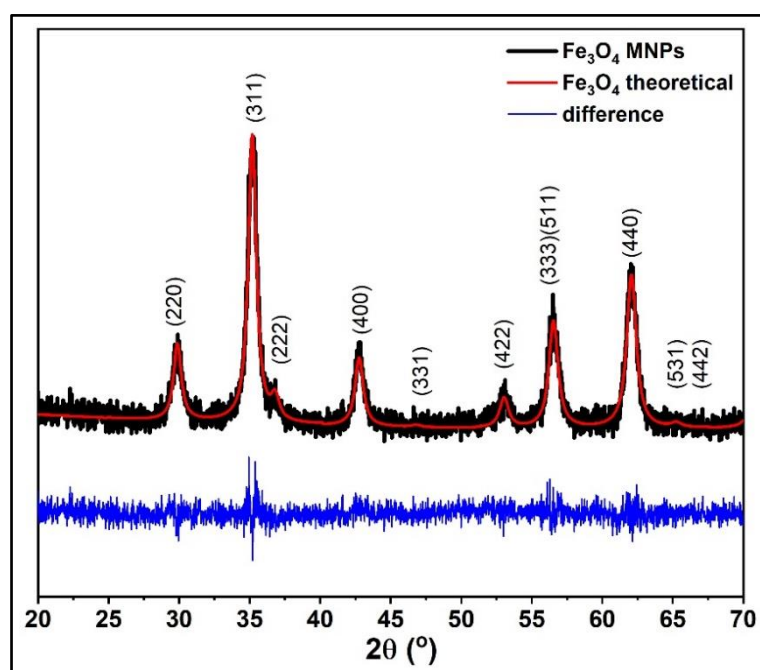

Figure S1. X-ray diffractogram acquired on SPIONs powder.

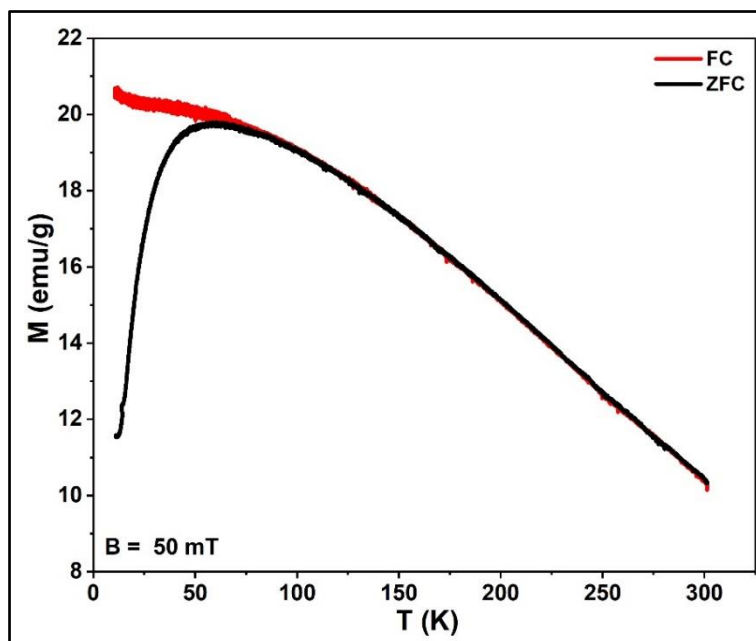

**Figure S2.** Zero Field Cooling and Field Cooling curves acquired on  $\text{Fe}_3\text{O}_4$  spherical magnetic nanoparticles.

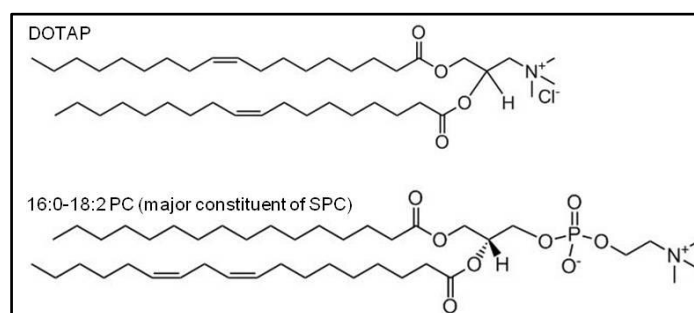

**Figure S3.** Chemical structures of DOTAP and of soybean phosphatidylcholine (SPC) lipids.

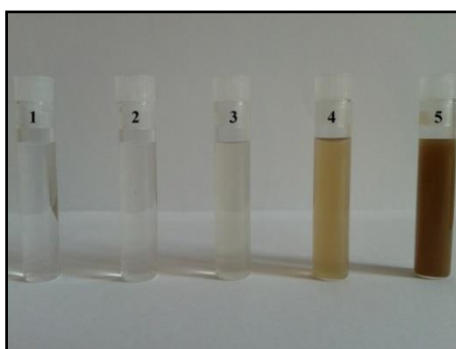

**Figure S4.** Optical image of 5 batches of liposomal dispersions ordered from left to right with respect to the volume of SPIONs dispersion used in the synthesis: 1. 0  $\mu\text{L}$  (bare liposomes) 2. 10  $\mu\text{L}$  3. 50  $\mu\text{L}$  4. 250  $\mu\text{L}$  5. 1000  $\mu\text{L}$ .

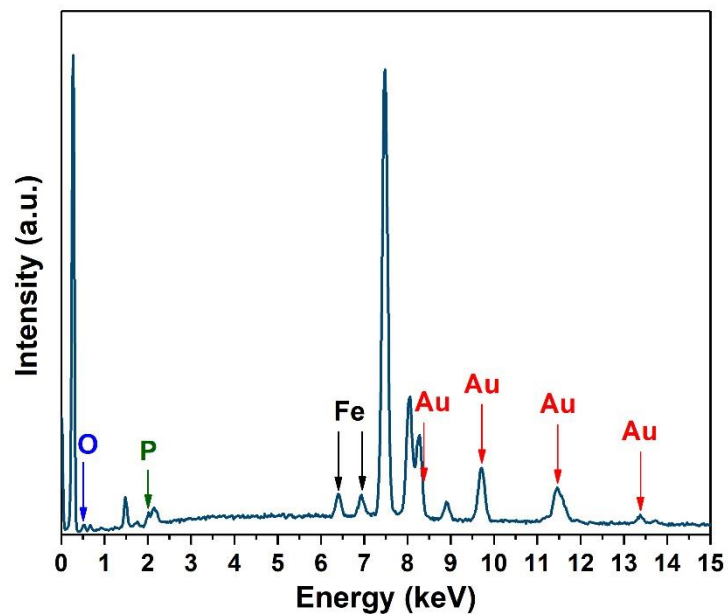

Figure S5. Energy Dispersive Spectroscopy (EDS) analysis of MLP250 sample.

Table S1. Zeta potential of nanoobjects.

| Sample                 | Dilution | pH   | $\zeta$ (mV) |
|------------------------|----------|------|--------------|
| AuPEG                  | 1:16     | 10.1 | -29.6        |
| Lipo 0 $\mu\text{L}$   | 1:4      | 3.56 | +59.7        |
| Lipo 10 $\mu\text{L}$  | 1:4      | 3.45 | +43.9        |
| Lipo 50 $\mu\text{L}$  | 1:4      | 3.53 | +43.4        |
| Lipo 250 $\mu\text{L}$ | 1:4      | 3.99 | +47.9        |
| Lipo1000 $\mu\text{L}$ | 1:4      | 3.24 | +51.1        |

Table S2. PCS measurements results for the liposomal dispersions.

| Liposome batch            | Dilution | PDI   | Hydrodynamic diameter (nm) |                   |
|---------------------------|----------|-------|----------------------------|-------------------|
|                           |          |       | Peak <sub>1</sub>          | Peak <sub>2</sub> |
| Simple (0 $\mu\text{L}$ ) | -        | 0.295 | 180.9                      | 31.27             |
| 10 $\mu\text{L}$          | -        | 0.431 | 179.8                      | 36.31             |
| 50 $\mu\text{L}$          | -        | 0.342 | 227.5                      | 33.55             |
| 250 $\mu\text{L}$         | 1:4      | 0.460 | 393.9                      | 71.60             |
| 1000 $\mu\text{L}$        | 1:16     | 0.302 | 389.2                      | 93.35             |

PDI = polydispersity index

**Table S3.** Assignment of the major vibrational bands recorded on cationic liposomes.

| Wavenumber<br>(cm <sup>-1</sup> ) | Assignment                                                                                                                         |
|-----------------------------------|------------------------------------------------------------------------------------------------------------------------------------|
| 718                               | symmetric stretch vibration of the C-N bonds from the N <sup>+</sup> (CH <sub>3</sub> ) <sub>3</sub> choline group                 |
| 765                               | stretching vibration of the quaternary ammonium group & stretching vibration of the esterified P-O bonds from the phosphate groups |
| 850                               | Asymmetric stretching vibration of the esterified O-P-O bonds from the phosphate groups                                            |
| 875                               | asymmetric stretch vibration of the C-N bonds from the N <sup>+</sup> (CH <sub>3</sub> ) <sub>3</sub> choline group                |
| 972                               | bending vibration of the CH groups                                                                                                 |
| 1044                              | symmetric stretching vibration of PO <sub>4</sub> <sup>3-</sup> group                                                              |
| 1085                              | stretching vibration of C-C bond                                                                                                   |
| 1265                              | deformation vibration of the unsaturated =CH group                                                                                 |
| 1302                              | twisting vibration of CH <sub>2</sub> groups                                                                                       |
| 1444                              | CH <sub>2</sub> /CH <sub>3</sub> scissoring vibrations                                                                             |
| 1658                              | C=C bond stretching vibrations                                                                                                     |
| 1741                              | stretching vibration of the C=O bond from the ester groups                                                                         |
| 2728                              | in-plane scissoring vibrations of CH <sub>2</sub>                                                                                  |
| 2854                              | symmetric stretching vibration of the CH <sub>2</sub> groups (fatty acids)                                                         |
| 2895                              | asymmetric stretching vibration of the CH <sub>2</sub> groups (fatty acids)                                                        |
| 2929                              | symmetric stretching vibration of the CH <sub>3</sub> groups                                                                       |
| 3010                              | stretching vibrations of unsaturated =C-H groups (fatty acids)                                                                     |

**Table S4.** Hyperthermia properties of PEGylated AuNPs and their liposomal complexes.

| Sample          | m <sub>Au</sub> (g)    | ΔT (K) | SAR (W/g) |
|-----------------|------------------------|--------|-----------|
| PEGylated AuNPs | 4.115·10 <sup>-5</sup> | 2.61   | 327       |
| MMPNHs          | 4.113·10 <sup>-5</sup> | 3.08   | 450       |
